# Supplementary material for: Seasonal dynamics in structural characteristics within bark stems of cultivated willow (Salix sp.) by NMR and time-gated Raman spectroscopy
Source: Royal Society of Chemistry journal article supplement (doi:10.1039/d2gc04476e), 2023-01-01
Supplement: d2gc04476e1.pdf [file d2gc04476e1.pdf]

## Supplementary material

Seasonal dynamics in structural characteristics within bark stems of cultivated willow (*Salix* sp.) by NMR and time-gated Raman spectroscopy

**Dou Jinze<sup>1#</sup>, Kögler Martin<sup>2</sup>, Kesari Kavindra Kumar<sup>1</sup>, Pitkänen Leena<sup>1</sup>, Vuorinen Tapani<sup>1</sup>**

<sup>1</sup>Department of Bioproducts and Biosystems, Aalto University, 02150 Espoo, Finland

<sup>2</sup>VTT Technical Research Centre of Finland, 90570 Oulu, Finland

#Corresponding author (and address of all authors):

Dr. Jinze Dou ([jinze.dou@aalto.fi](mailto:jinze.dou@aalto.fi)), +358413115001

**Table S1. Mass balance (w/w %) of the willow bark that is harvested from five different seasons (02-17 to 12-04) and characteristics of the purified cellulose.** Standard deviation is included inside the parenthesis. “a” denotes that this acid-insoluble lignin data is acquired from the sample after all pretreatments (N, **Fig. S1**).

|                                              |                                                | 02-17      | 04-23      | 07-13      | 09-23      | 12-04       |
|----------------------------------------------|------------------------------------------------|------------|------------|------------|------------|-------------|
| mass<br>balance                              | DCM                                            | 3 (0)      | 3 (0.1)    | 3 (0.1)    | 2 (0.1)    | 4 (0)       |
|                                              | acetone                                        | 4 (0)      | 4 (0.8)    | 2 (0.1)    | 2 (2.0)    | 6 (0)       |
|                                              | water                                          | 5 (0)      | 7 (0.9)    | 10 (7.6)   | 9 (3.8)    | 6 (0)       |
|                                              | extracts (sum)                                 | 12 (0)     | 14 (1.8)   | 15 (7.9)   | 13 (1.7)   | 16 (0)      |
|                                              | crude pectin                                   | 3 (0)      | 4 (0.2)    | 4 (0.2)    | 4 (0.7)    | 3 (0.6)     |
|                                              | hemicellulose                                  | 1 (0)      | 3 (0)      | 2 (0)      | 3 (0)      | 2 (0)       |
|                                              | cellulose                                      | 17 (0)     | 31 (0)     | 32 (0)     | 27 (0)     | 24 (0)      |
|                                              | acid-insoluble “klason<br>lignin” <sup>a</sup> | 12.9 (0)   | 9.6 (0.6)  | 8.6 (0.2)  | 8.8 (0.4)  | 10.6 (0.04) |
|                                              | overall sum                                    | 47         | 61         | 62         | 56         | 56          |
| characteristic<br>s of purified<br>cellulose | Viscosity ([ $\eta$ ] ml/g)                    | 401 (0)    | 577 (5)    | 671 (9)    | 486 (4)    | 413 (5)     |
|                                              | Mn (kDa)                                       | 64 (2)     | 69 (2)     | 88 (2)     | 101 (50)   | 57 (0)      |
|                                              | Mw (kDa)                                       | 221 (2)    | 229 (1)    | 272 (3)    | 266 (94)   | 189 (2)     |
|                                              | Mw/Mn (degree of<br>dispersion)                | 3.5 (0.06) | 3.3 (0.08) | 3.1 (0.02) | 2.8 (0.43) | 3.3 (0.02)  |

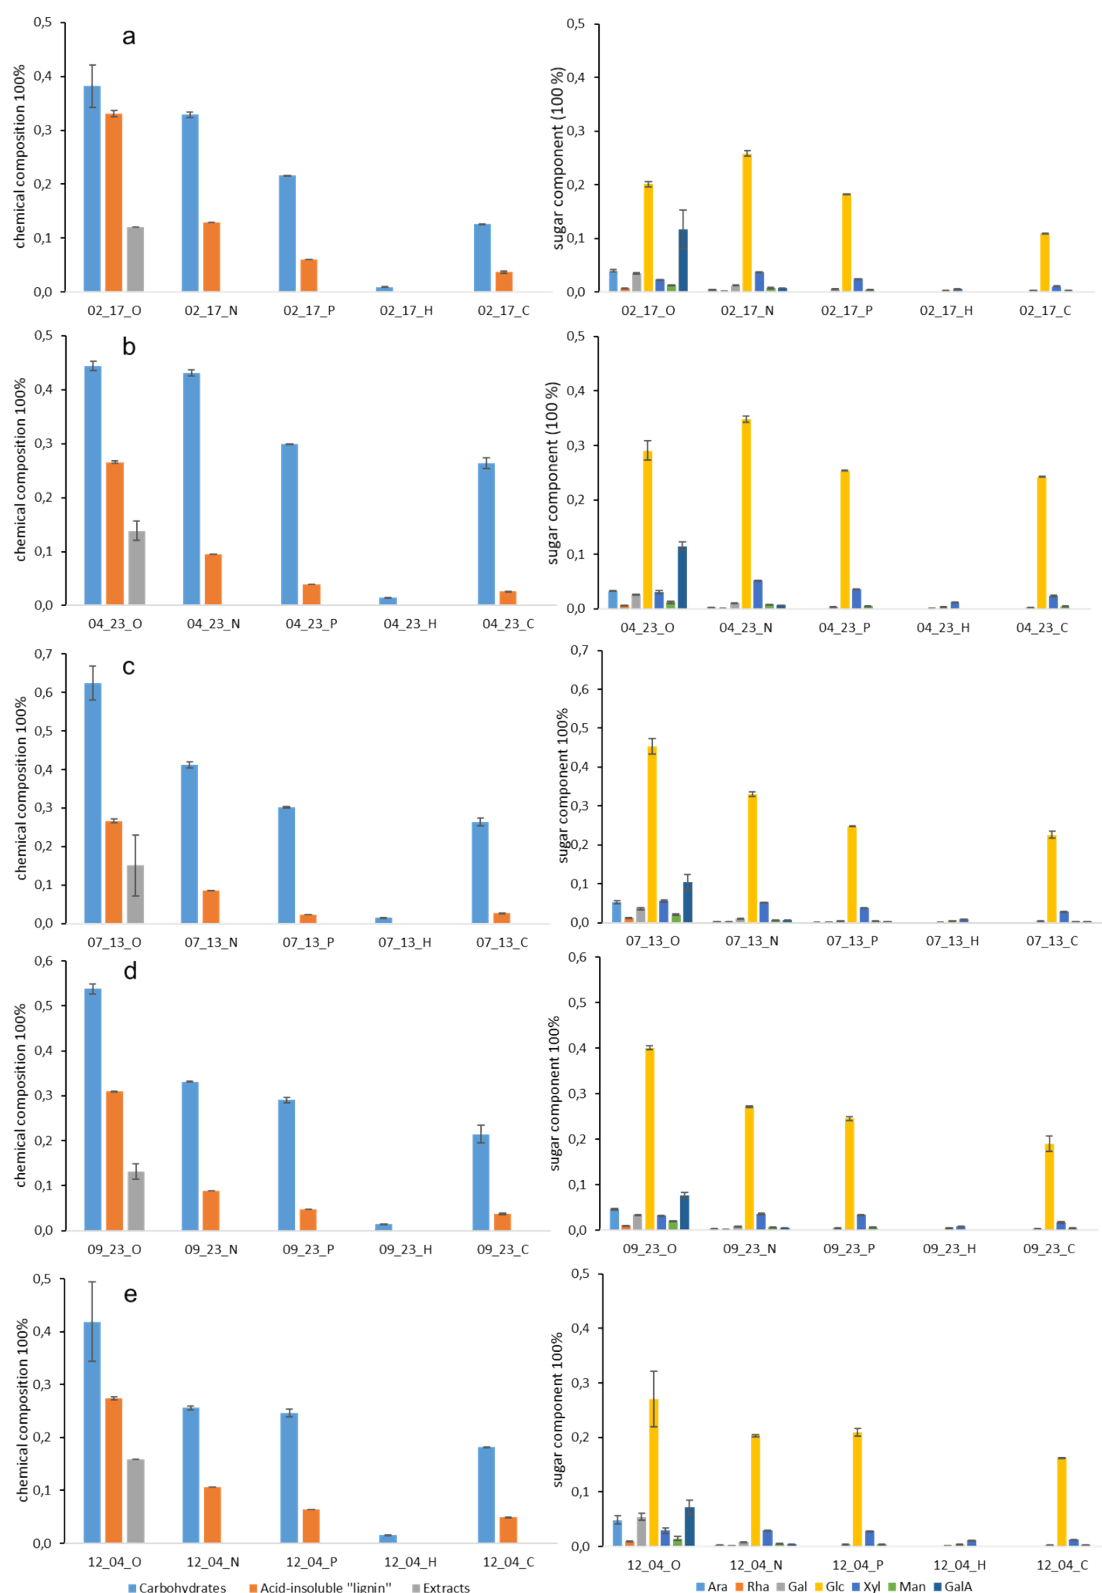

**Fig. S1. Overall chemical composition (% of the accepted dry mass) (left) and carbohydrate composition (% of anhydro sugars in the monosaccharide (right) at the multiple solid residues that was processed throughout scheme Fig. 1. a 02-17. b 04-23. c 07-13. d 09-23. e 12-04. "O" refers to the original sample; "N" refers to the sample after treatment of solvent extraction, crude pectin removal, protein removal, and 0.1M NaOH treatment; "P" refers to the solid residue after the peracetic acid treatment; "H" refers to the recovered hemicellulose; "C" refers to the recovered cellulose. Abbreviations: arabinose (Ara), rhamnose (Rha), galactose (Gal), glucose (Glc), xylose (Xyl), mannose (Man), galacturonic acid (GalA).**

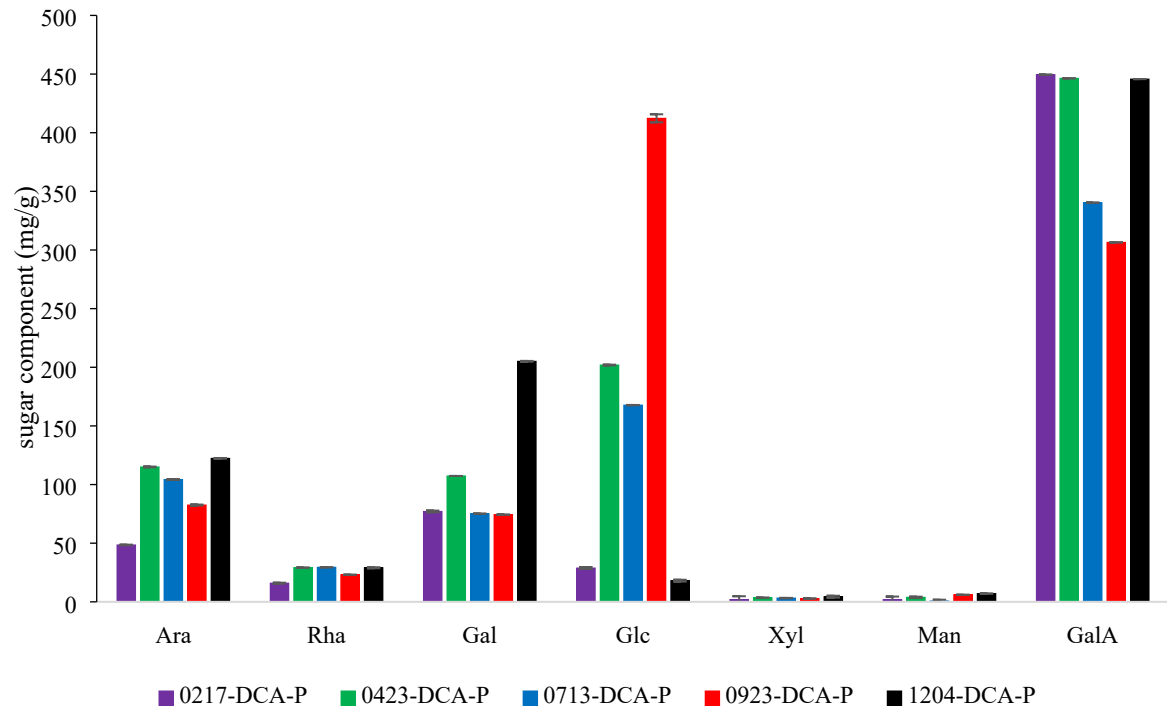

**Fig. S2. Chemical compositional analysis of the dialyzed pectin (DCA-P) from five different seasoned willow bark (02-17; 04-23; 07-13; 09-23; 12-04) that is harvested throughout one calendar year.**

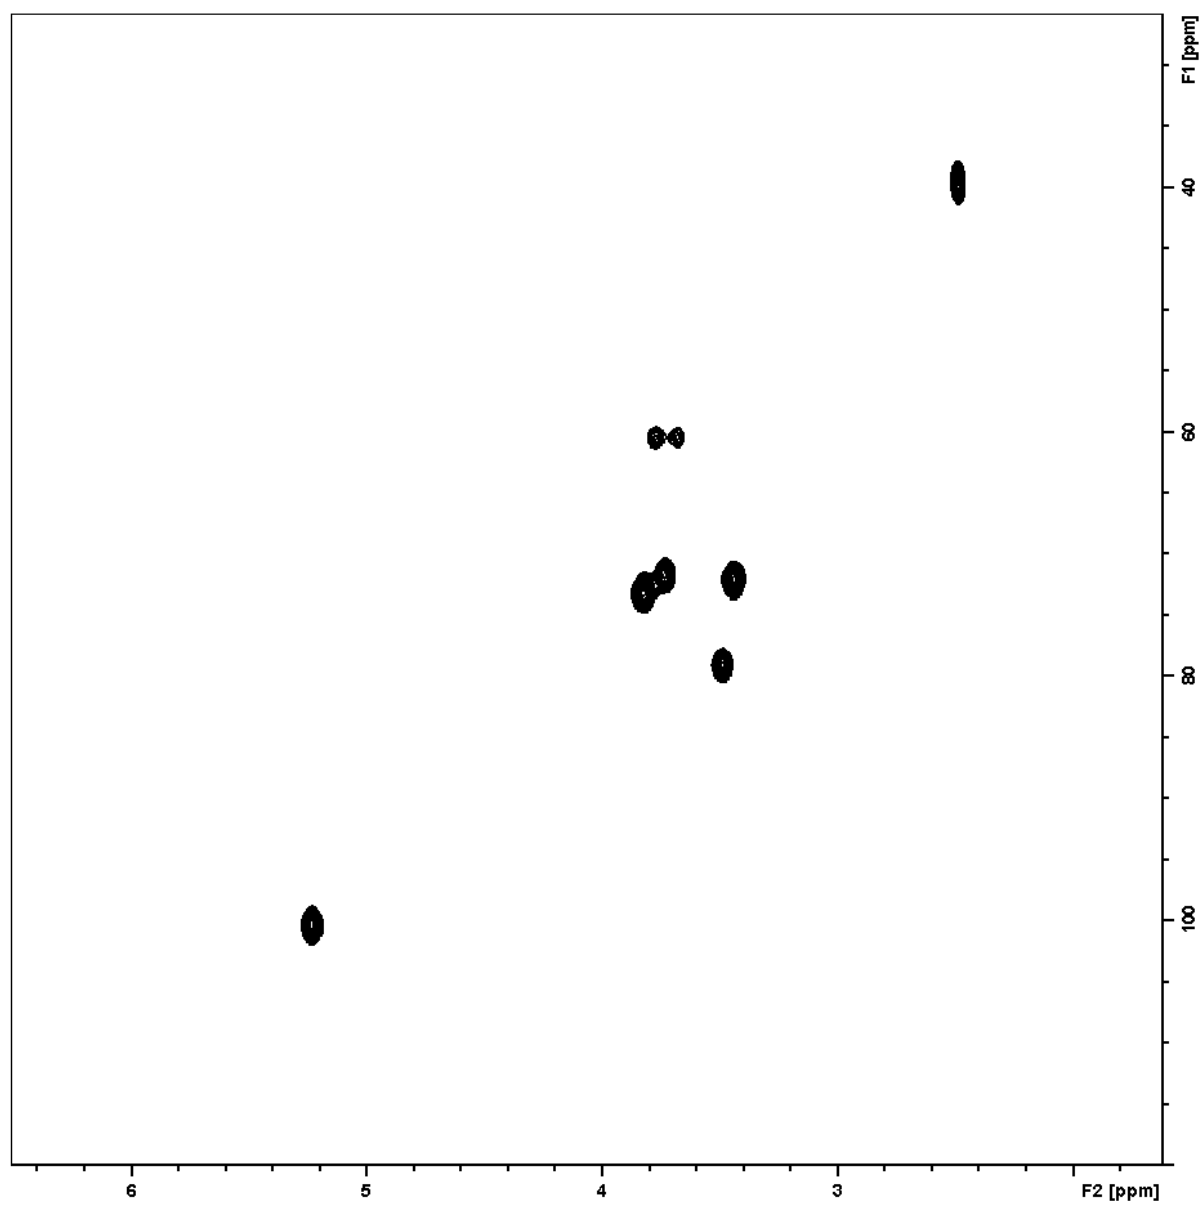

Fig. S3. HSQC NMR spectrum of the authentic starch in DMSO-*d*<sub>6</sub>/pyridine-*d*<sub>5</sub> (v/v 4/1).

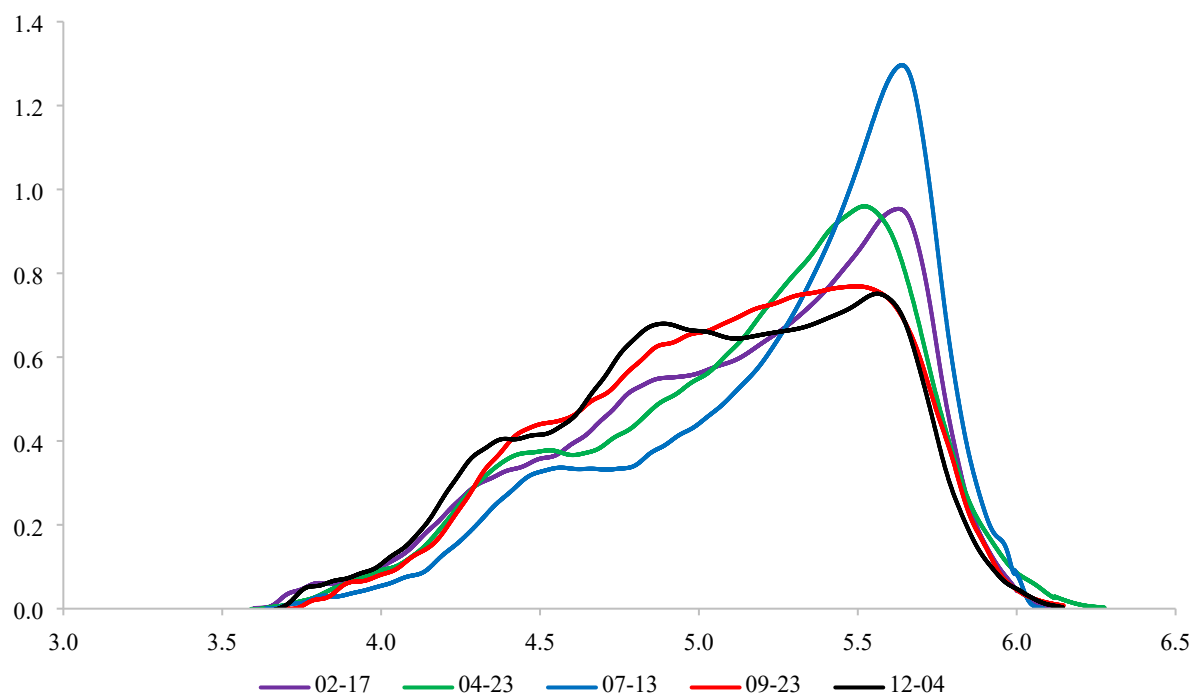

**Fig. S4.** The molar mass distribution of recovered cellulose from five different seasoned willow bark (02-17; 04-23; 07-13; 09-23; 12-04) that is harvested throughout one calendar year.

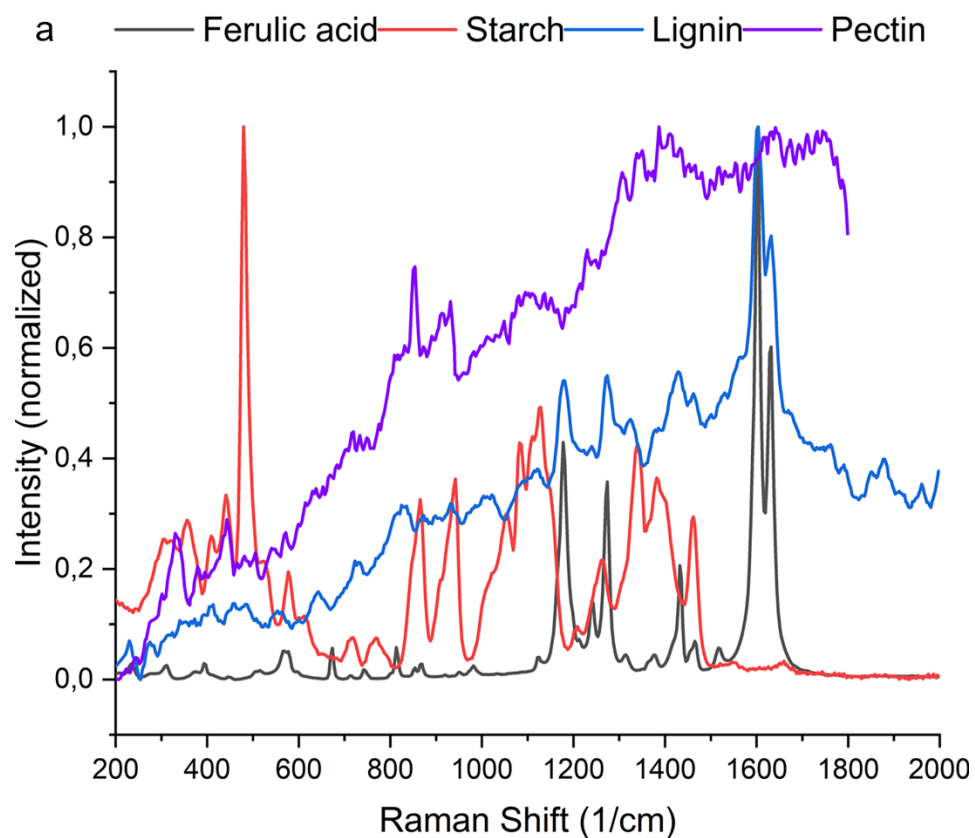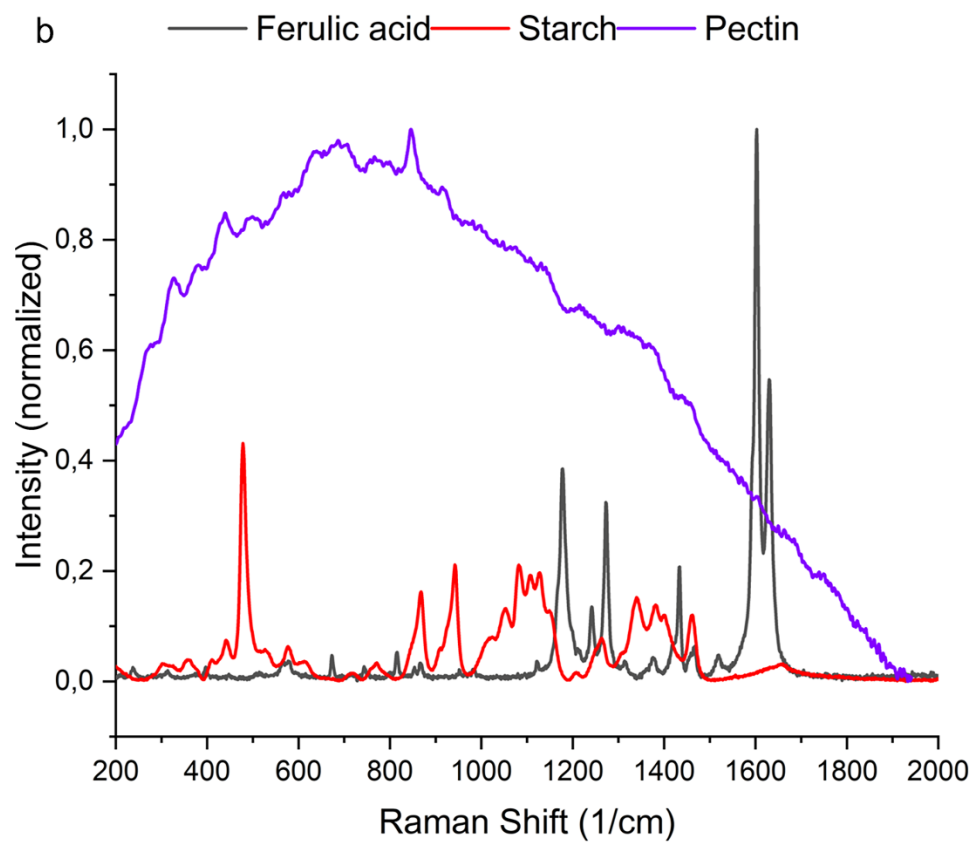

**Fig. S5. Raman analysis of authentic ferulic acid, starch, kraft lignin and pectin for reference. a** Time-gated Raman (TG). **b** Continuous wave (CW) Raman. No lignin results were acquired from CW Raman due to the excessive fluorescence.
